# Supplementary material
Source: Springer Nature journal article supplement (https://www.springermedizin.de/resource/supplementary/12891_2008_601_MOESM1_ESM.pdf/9506326)

**(a) Male**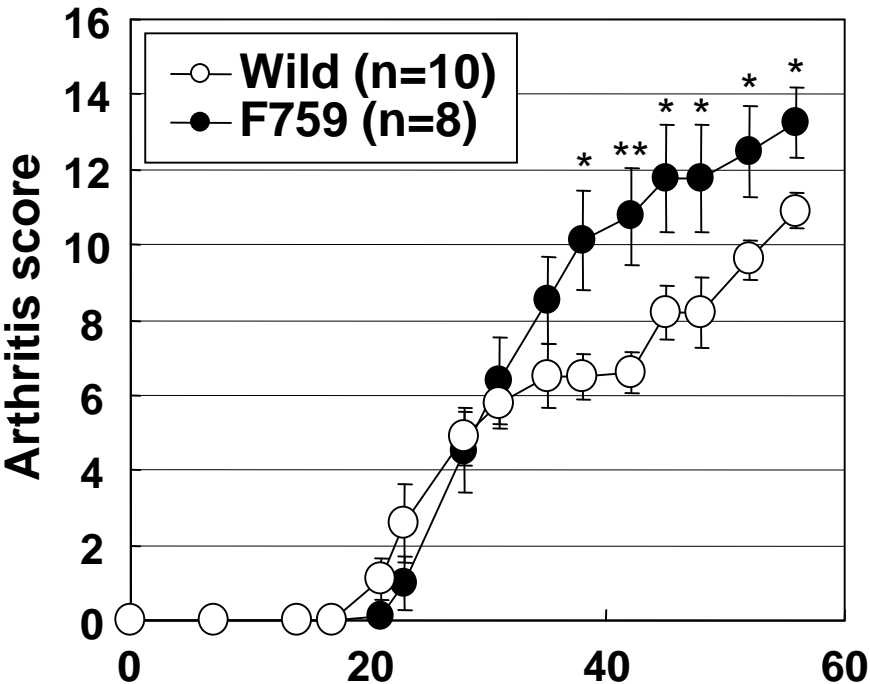**(b) Female**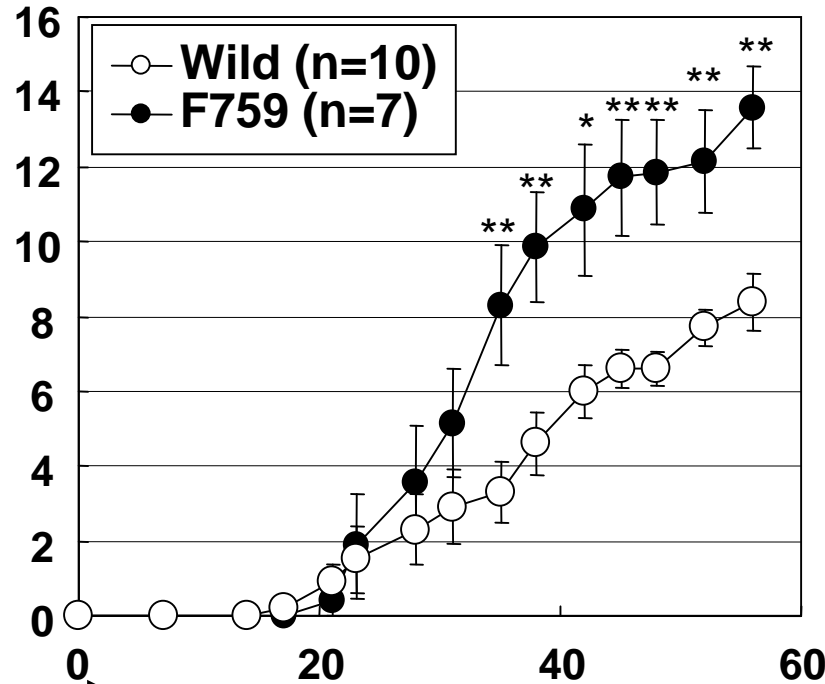

Days after first immunization

Supplement: MOESM1 [file 9506326]
